# Supplementary figures and images for: Seasonal Patterns of Zoonotic Cutaneous Leishmaniasis Caused by L. major and Transmitted by Phlebotomus papatasi in the North Africa Region, a Systematic Review and a Meta-Analysis
Source: MDPI journal article supplement (doi:10.3390/microorganisms10122391), 2022-12-02

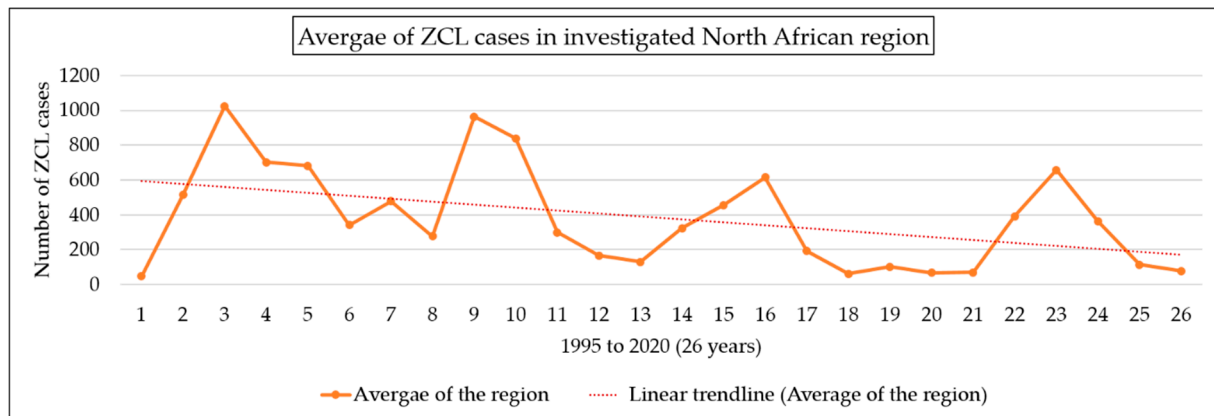

Figure S1. The average evolution of ZCL cases in whole North African region from 1995 to 2020 (26 years),

Supplement: s1 [file s1]
